# Supplementary material for: Encapsulating porous SnO2into a hybrid nanocarbon matrix for long lifetime Li storage
Source: Royal Society of Chemistry journal article supplement (doi:10.1039/c7ta09544a), 2017-01-01
Supplement: c7ta09544a1.pdf [file c7ta09544a1.pdf]

## Supporting Information for

# Encapsulating porous SnO<sub>2</sub> into hybrid nanocarbon matrix for long lifetime Li storage

Yi Zhao,<sup>ab</sup> Luyuan Paul Wang,<sup>bd</sup> Shibo Xi,<sup>c</sup> Yonghua Du,<sup>c</sup> Qianqian Yao,<sup>a</sup> Lunhui

Guan, <sup>\*a</sup> Zhichuan J. Xu<sup>\*bde</sup>

<sup>a</sup>CAS Key Laboratory of Design and Assembly of Functional Nanostructures, and Fujian Key Laboratory of Nanomaterials, Fujian Institute of Research on the Structure of Matter, Chinese Academy of Sciences. Fuzhou 350108, China

<sup>b</sup>School of Materials Science and Engineering, Nanyang Technological University, Singapore 639798, Singapore

<sup>c</sup>Institute of Chemical and Engineering Sciences A\*STAR, 1 Pesek Road, 627833, Singapore

<sup>d</sup>Singapore-HUJ Alliance for Research and Enterprise (SHARE), Nanomaterials for Energy and Energy-Water Nexus (NEW), Campus for Research Excellence and Technological Enterprise (CREATE), Singapore 138602

<sup>e</sup>Energy Research Institute @ NTU, Nanyang Technological University, 50 Nanyang Drive, Singapore, Singapore 639798, Singapore

<sup>\*</sup>Corresponding Author

E-mail: xuzc@ntu.edu.sg, guanlh@fjirsm.ac.cn

## EXPERIMENTAL SECTION

**Synthesis of G@porous SiO<sub>2</sub> composite:** The graphene oxide (GO) was synthesized via a modified Hummer's method. In a typical experiment, 160 mg cetyltrimethylammonium bromide (CTAB) was firstly dissolved in a mixture of 30 ml H<sub>2</sub>O, 120 ml ethanol, and 1.5 ml NH<sub>3</sub>.H<sub>2</sub>O. Then, 40 mg GO was dispersed in the above solution by ultrasonication, followed with slow addition of 1 mL tetraethyl orthosilicate (TEOS) and kept under stirring for 12 h. After washed with H<sub>2</sub>O and dried at 80 °C, this product was further annealing at 800 °C for 3 h at Ar atmosphere to obtain G@porous SiO<sub>2</sub> composite.

**Synthesis of G@SiO<sub>2</sub>@SnO<sub>2</sub> composite:** 200 mg G@porous SiO<sub>2</sub> composite and 250 mg SnCl<sub>2</sub>.2H<sub>2</sub>O was firstly dispersed into 10 ml ethanol by ultrasonication. Then, the above solution was stirred at 45 °C to evaporate the ethanol. The obtained mixture was fine ground and calcinated at 350 °C for 3h in Air to obtain G@SiO<sub>2</sub>@SnO<sub>2</sub> composite.

**Synthesis of G@p-SnO<sub>2</sub>@C composite:** Typically, 160 mg above G@SiO<sub>2</sub>@SnO<sub>2</sub> composite was sonicated in 14 mL H<sub>2</sub>O for 0.5 h. Then, 0.05 mL NH<sub>3</sub>.H<sub>2</sub>O and 0.5 ml 0.01 M CTAB aqueous solutions were dropped into the above dispersion. After vigorously stirred for 0.5 h, 25 mg resorcinol and 35μl formaldehyde were added and kept under stirring for 16 h at room temperature. The obtained product was filtered and washed with water, dried at 80 °C, and calcinated at 600 °C for 2 h under Ar atmosphere for carbonization. Finally, SiO<sub>2</sub> layer was

removed with 1M NaOH solution at 50 °C for 12 h to obtain G@p-SnO<sub>2</sub>@C composite. The G@p-SnO<sub>2</sub> composite was fabricated by directly etching the G@SiO<sub>2</sub>@SnO<sub>2</sub> composite with 1M NaOH solution.

**Synthesis of G@SnO<sub>2</sub> and G@SnO<sub>2</sub>@C composites:** G@SnO<sub>2</sub> composite was synthesized through the redox reaction between GO and SnCl<sub>2</sub>. In a typical experiment, 200 mg SnCl<sub>2</sub> was added into 50 mL 0.2 HCl solution containing 24 mg GO. After being stirred for 1 h at room temperature, this solution was further refluxed at 90 °C for 1 h to obtain G@SnO<sub>2</sub> composite. For the synthesis of G@SnO<sub>2</sub>@C composite, 50 mg G@SnO<sub>2</sub> was added into 7 ml 0.25M glucose solution and sonicated for 0.5 h. Then, the solution was transferred into 25 mL Teflon-line stainless steel autoclave and kept at 170 °C for 3 h. After filtered and washed with ethanol and water, this sample was annealed at 500 °C for 3h at Ar atmosphere to obtain G@SnO<sub>2</sub>@C composite.

**Materials Characterization:** The structure and morphology of the obtained samples were characterized via scanning electron microscopy (SEM, JSM-7600F and SU-8010), transmission electron microscope (TEM, JEM-2010F and Tecnai F20), x-ray photoelectron spectroscopy (XPS, ESCALAB 250Xi), Brunauer–Emmett–Teller surface area analyzer (BET, Micromeritics ASAP2020), X-ray diffraction (Shimadzu, XRD-6000), and Thermogravimetry analyses (TGA, Q500). XANES was performed at Singapore Synchrotron Light Source, XAFCA beamline.

**Electrochemical Measurements:** The electrochemical behaviors of G@p-

SnO<sub>2</sub>@C and G@p-SnO<sub>2</sub> composites were investigated via CR2032 coin-type test cells. The working electrodes consisted of 80 wt% active materials, 10 wt% conductive carbon (ketjen black), and 10 wt% carboxymethyl cellulose as the binder, which were mixed with de-ionized water, pasted on Ni foam, and then dried at 80 °C overnight under vacuum before use. Cells were assembled in an Ar-filled glove box with concentration of moisture and oxygen below 1 ppm. The counter electrode was lithium foil and the separator was celgard 2300 membrane. The electrolyte was 1M LiPF<sub>6</sub> in ethylene carbonate (EC): ethylmethyl carbonate (EMC): dimethyl carbonate (DMC) with a volume ratio of 1: 1: 1. The obtained cells were discharged and charged on a Neware Battery tester over a range of 0.05 V to 3.0 V vs. Li<sup>+</sup>/Li at room temperature. Cyclic voltammetry (CV) test was carried out on a PINE WaveDriver 20 bipotentiostat with a scan rate of 0.5 mV s<sup>-1</sup>.

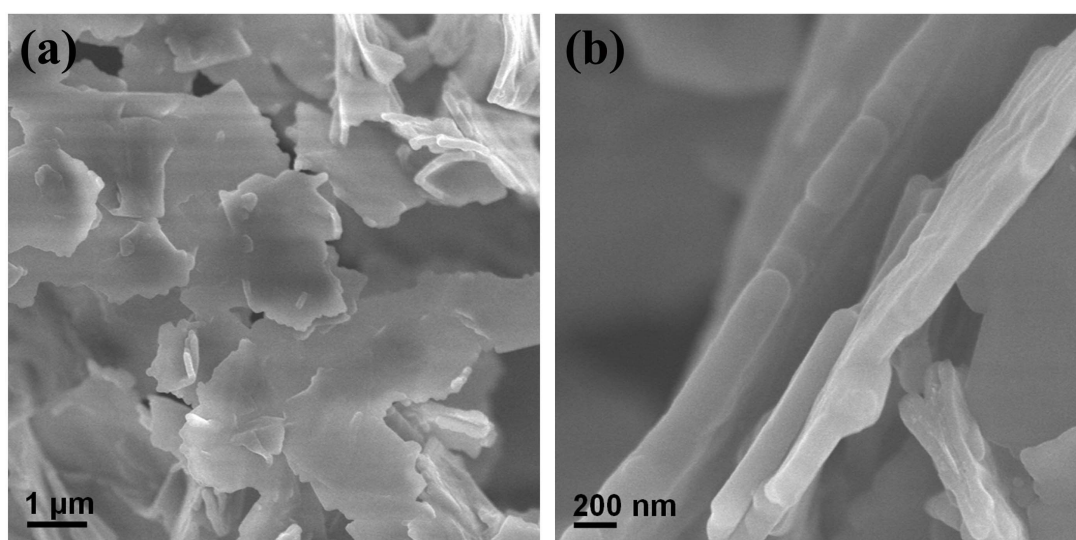



**Fig. S1** (a-b) SEM images of G@porous SiO<sub>2</sub> composite.

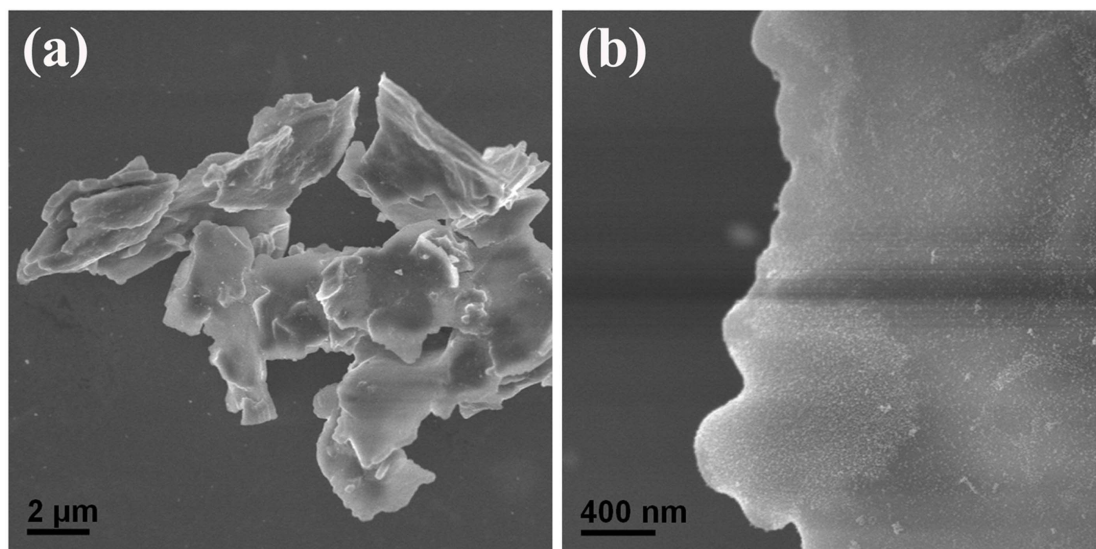

**Fig. S2** (a-b) SEM images of G@SiO<sub>2</sub>@SnO<sub>2</sub> composite.

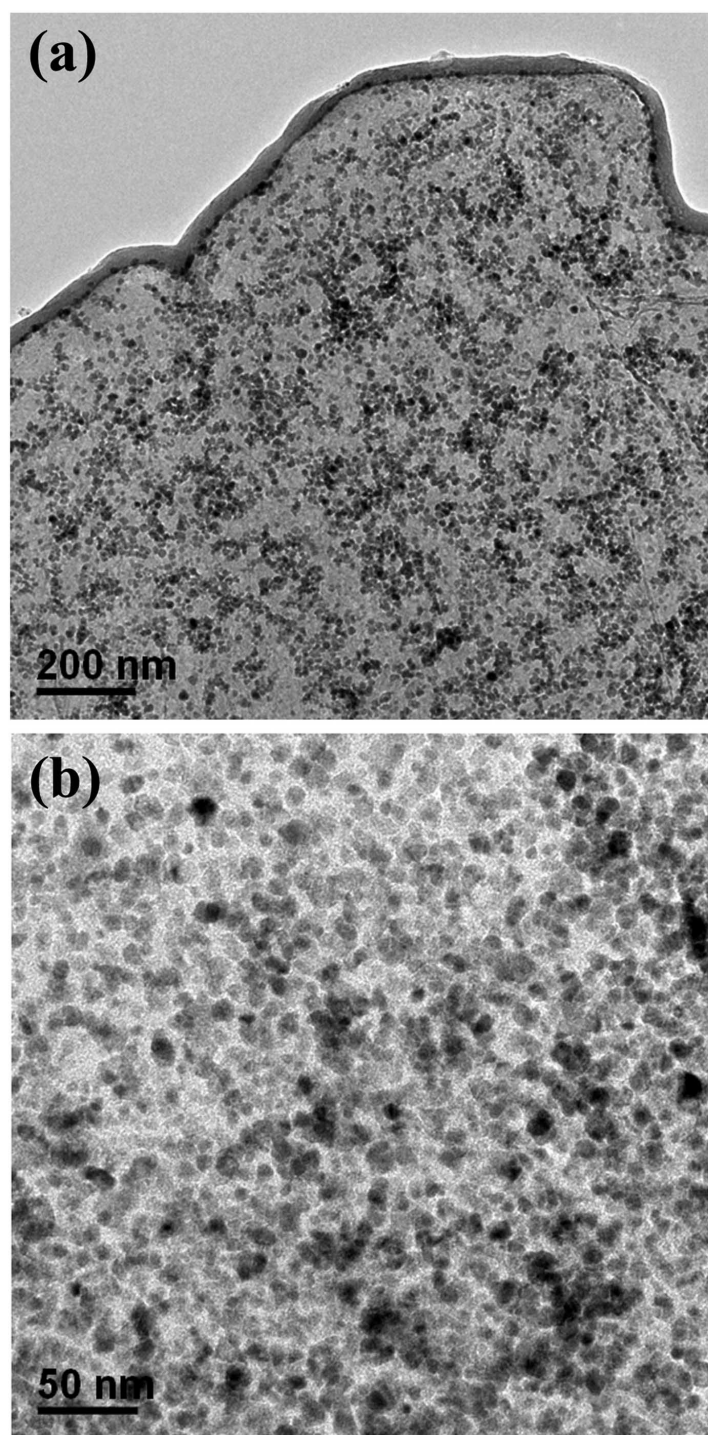

**Fig. S3** (a-b) TEM images of G@p-SnO<sub>2</sub>@C composite from other aspect.

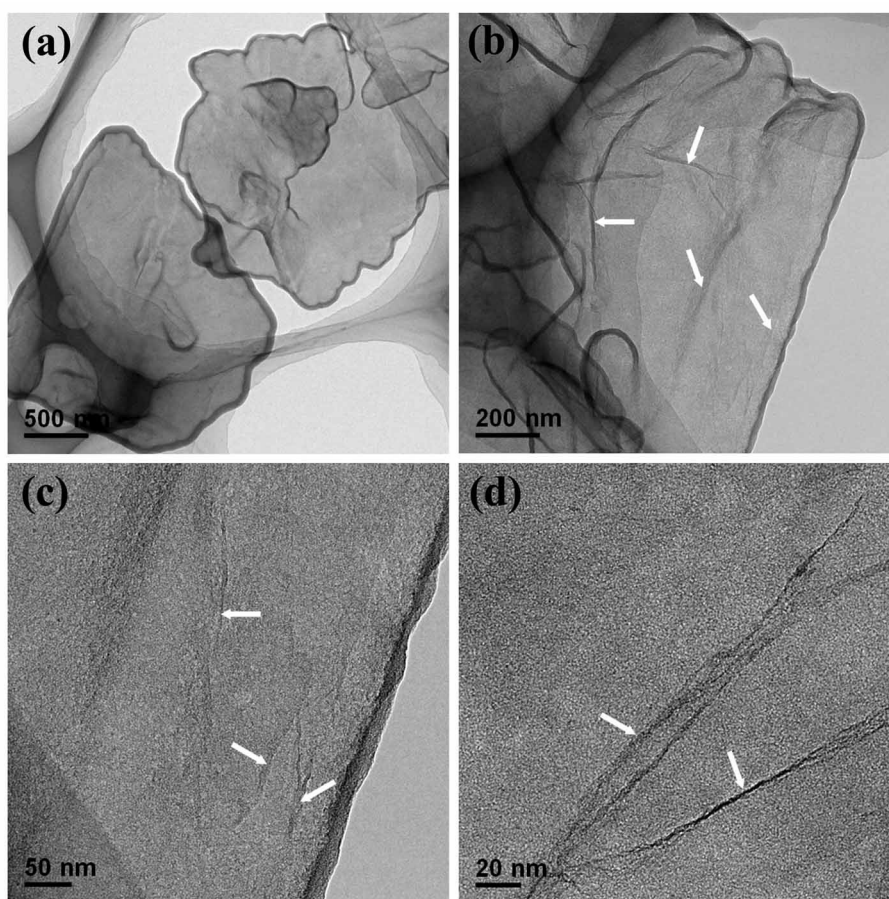

**Fig. S4** TEM images of the pure hybrid nanocarbon matrix, showing the “carbon house” microstructure of this composite with graphene (white arrows) as “floor” and carbon coating layer as “walls and ceiling”.

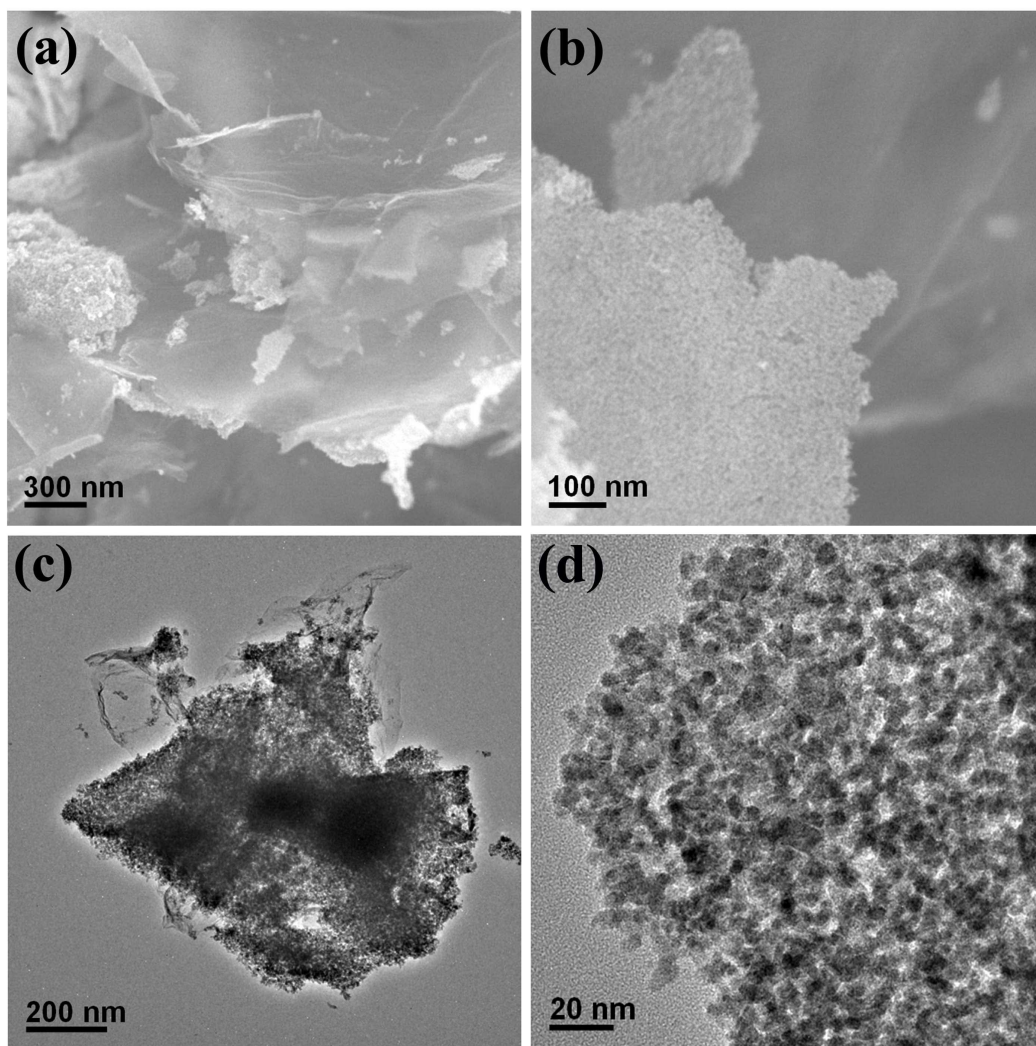

**Fig. S5** (a-b) SEM and (c-d) TEM images of G@p-SnO<sub>2</sub>.



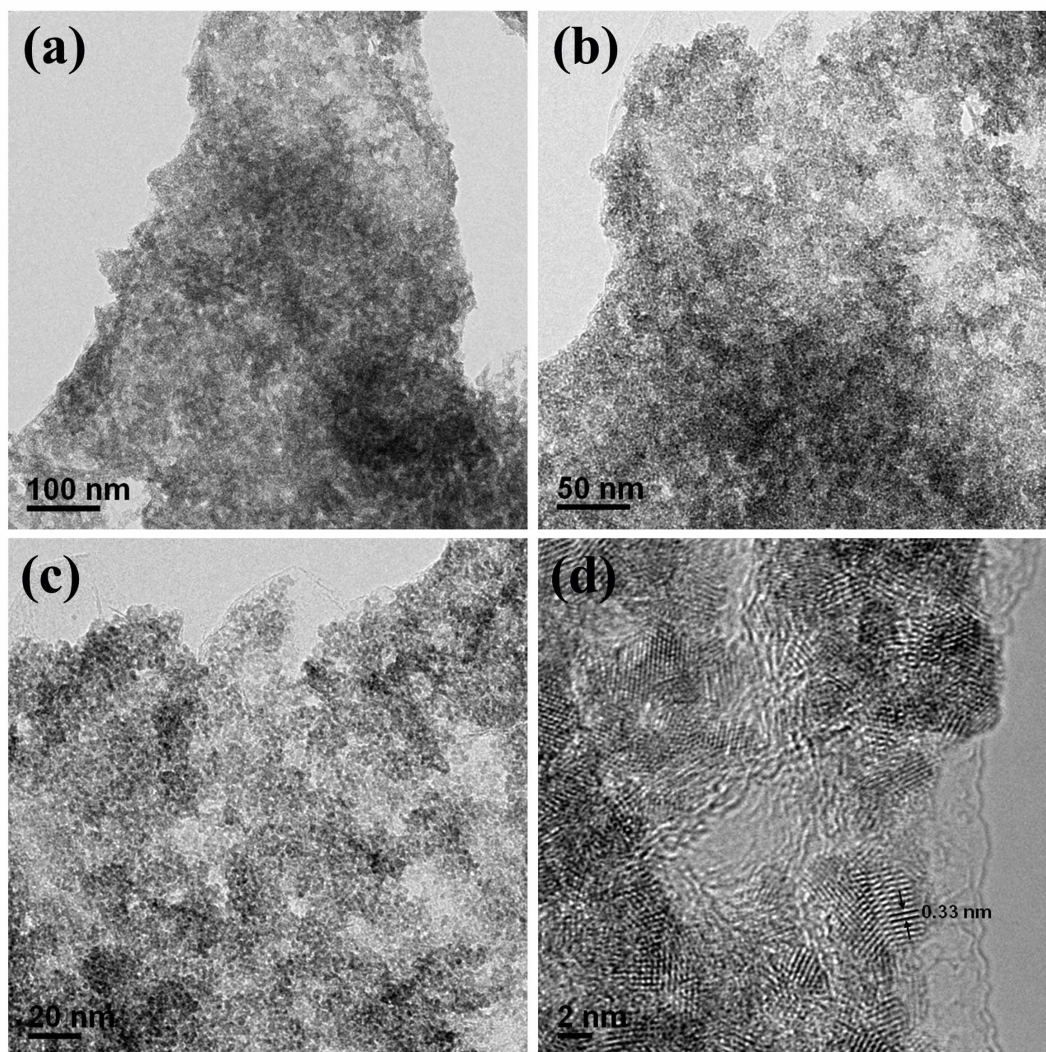

**Fig. S6** TEM images of G@SnO<sub>2</sub> composite.

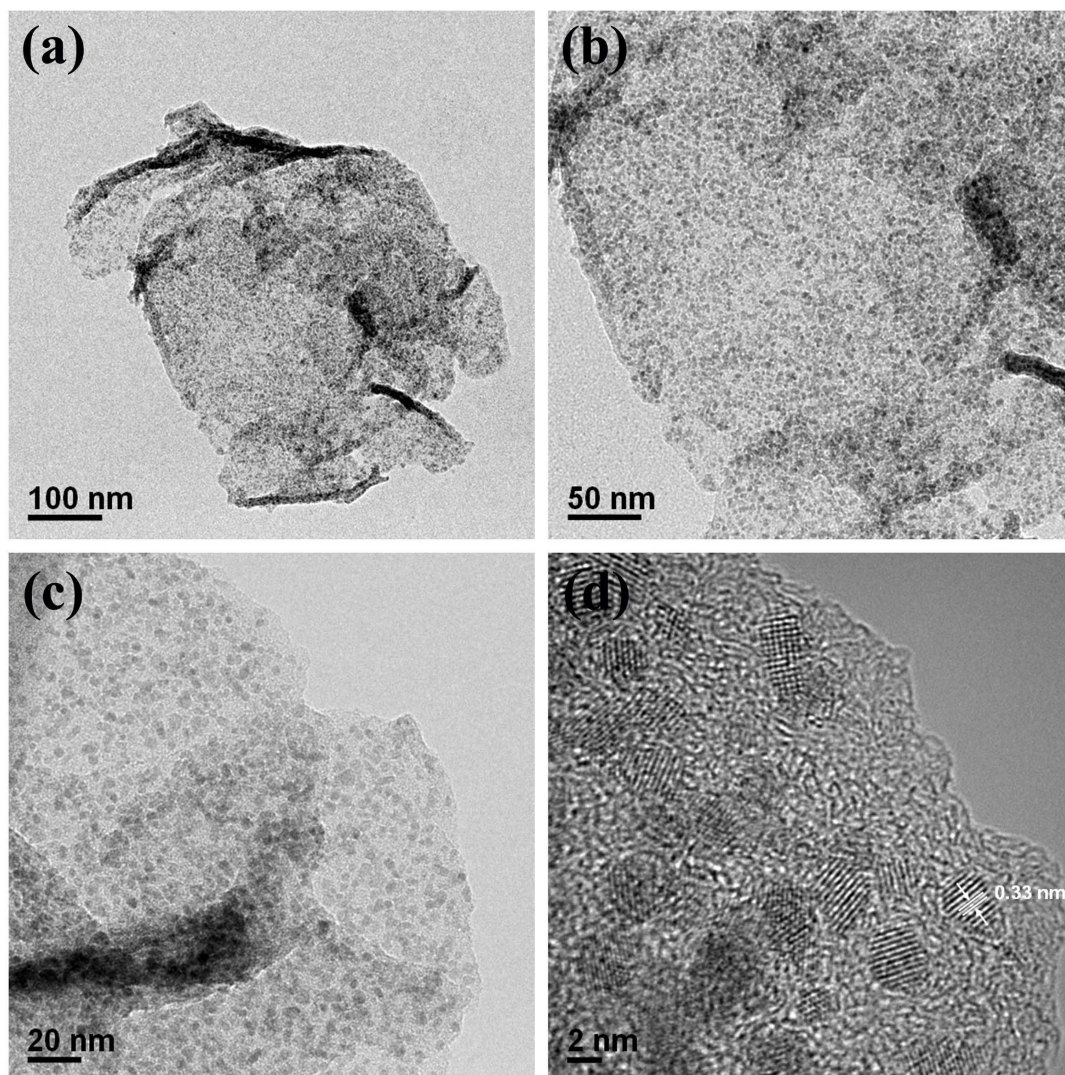

**Fig. S7** TEM images of G@SnO<sub>2</sub>@C composite.



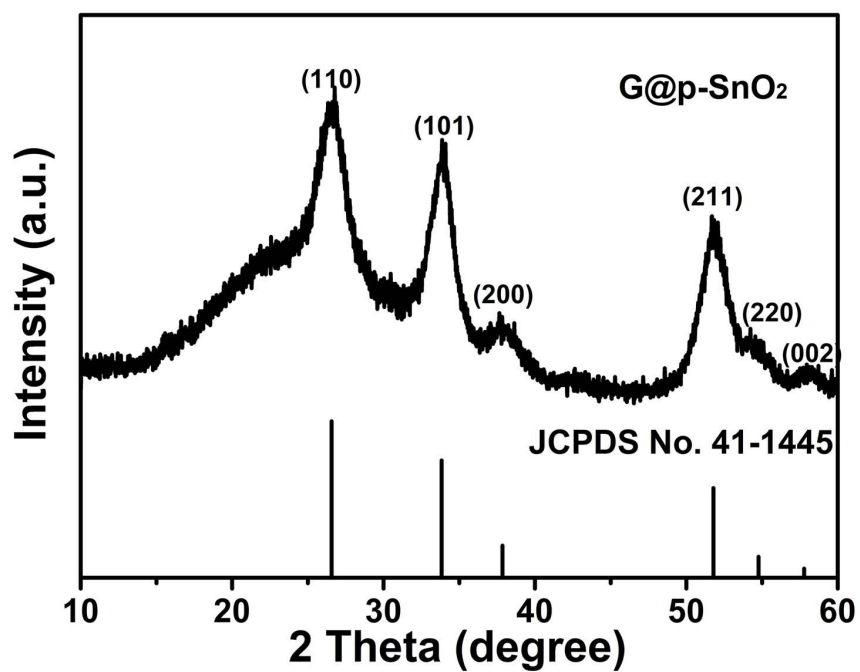

Fig. S8 XRD pattern of G@p-SnO<sub>2</sub> composite.

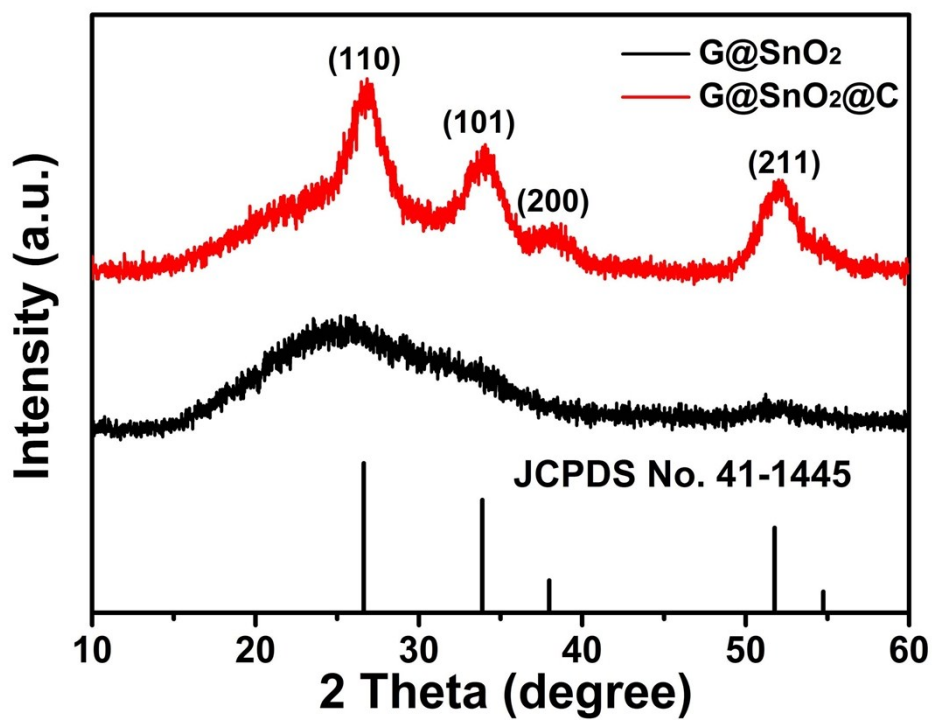

Fig. S9 XRD patterns of G@SnO<sub>2</sub> and G@SnO<sub>2</sub>@C composites.

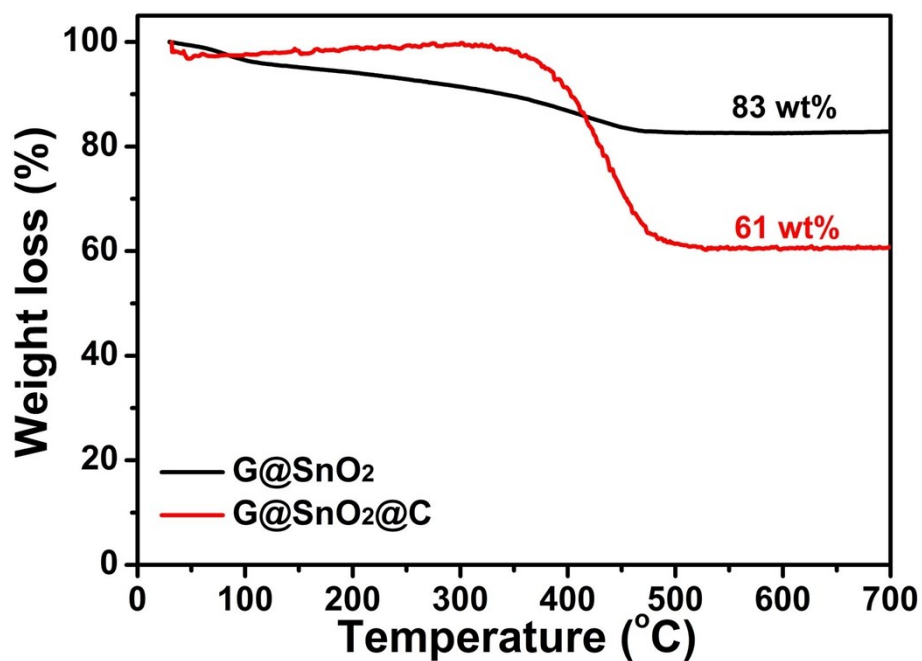

Fig. S10 TGA curves of G@SnO<sub>2</sub> and G@SnO<sub>2</sub>@C composites.

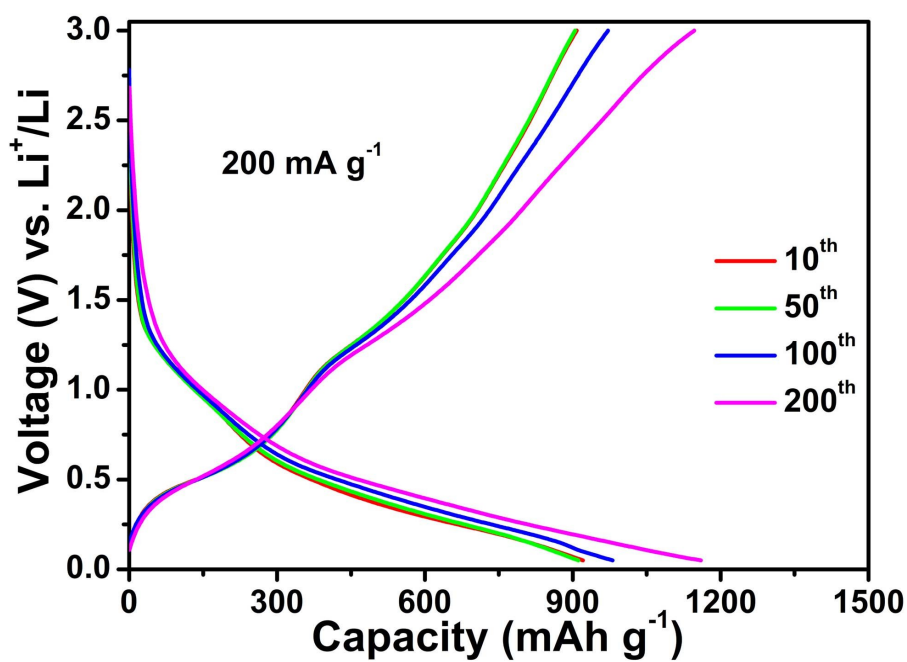

Fig. S11 Selected discharge/charge profiles of G@p-SnO<sub>2</sub>@C electrode at 200 mA g<sup>-1</sup> for LIBs.



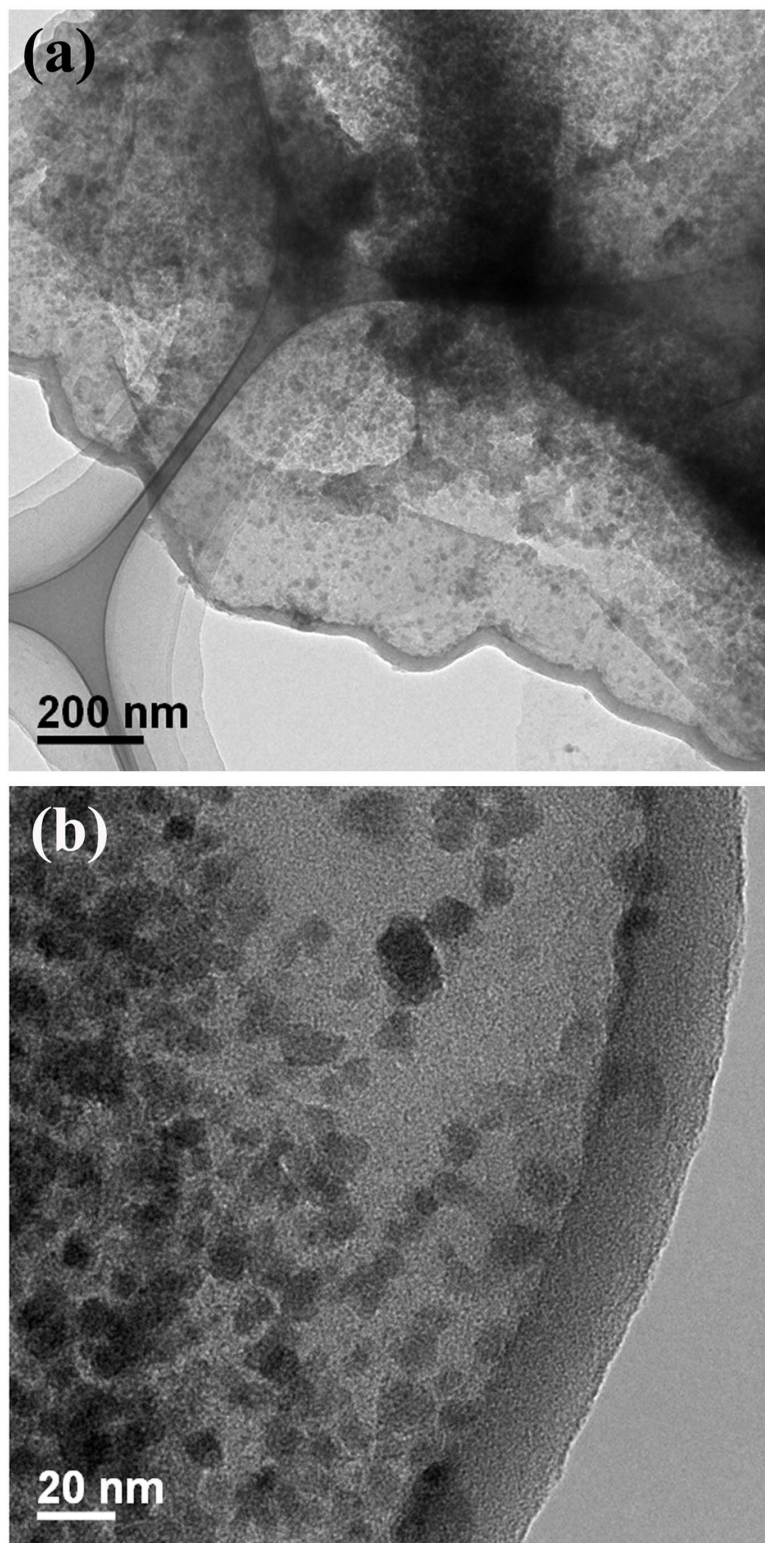

**Fig. S12** (a-b) TEM images of G@p-SnO<sub>2</sub>@C electrode after first discharge-charge cycle for LIBs.

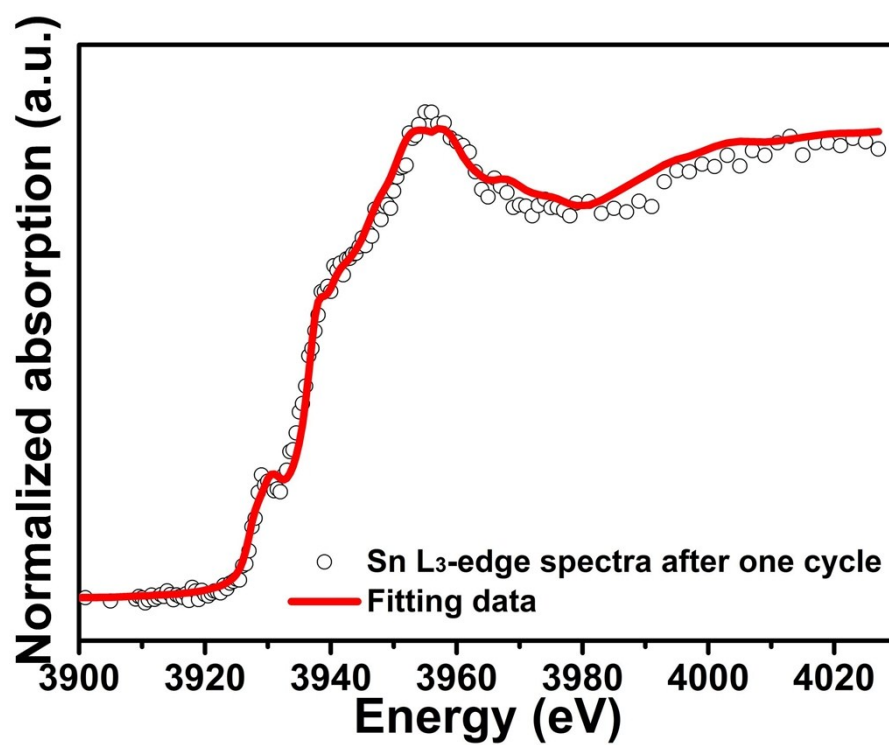

**Fig. S13** The Sn L<sub>3</sub>-edge XANES spectra of G@p-SnO<sub>2</sub>@C electrode and its fitting data based on linear combination fit analysis with commercial SnO<sub>2</sub> and SnO as standards.

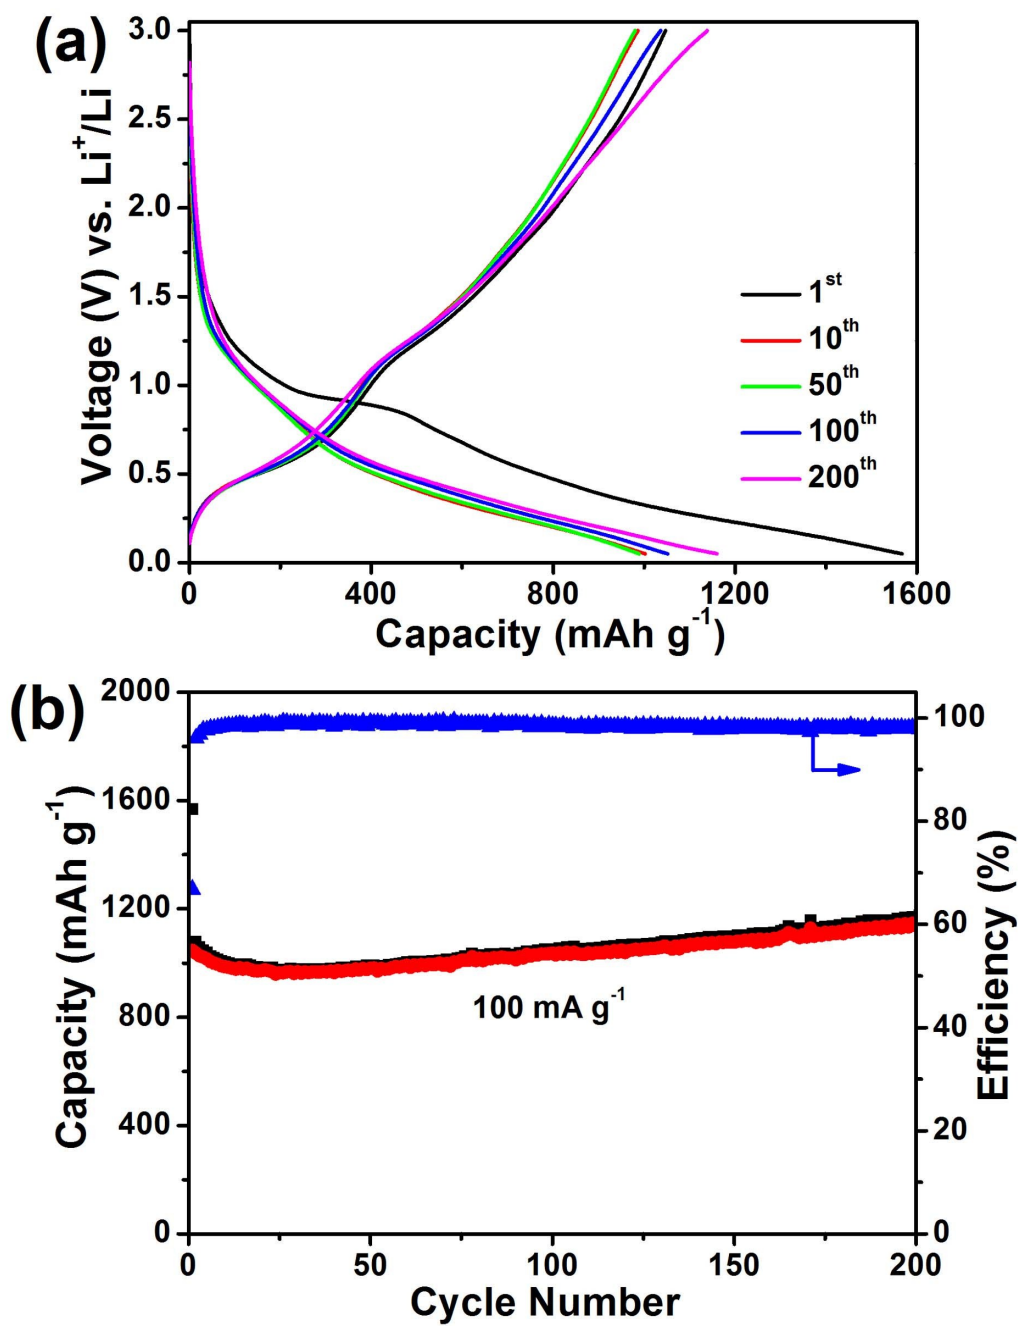

**Fig. S14** (a) Typical discharge/charge profiles, and (b) cycling performance of G@p-SnO<sub>2</sub>@C electrode at 100 mA g<sup>-1</sup> for LIBs.

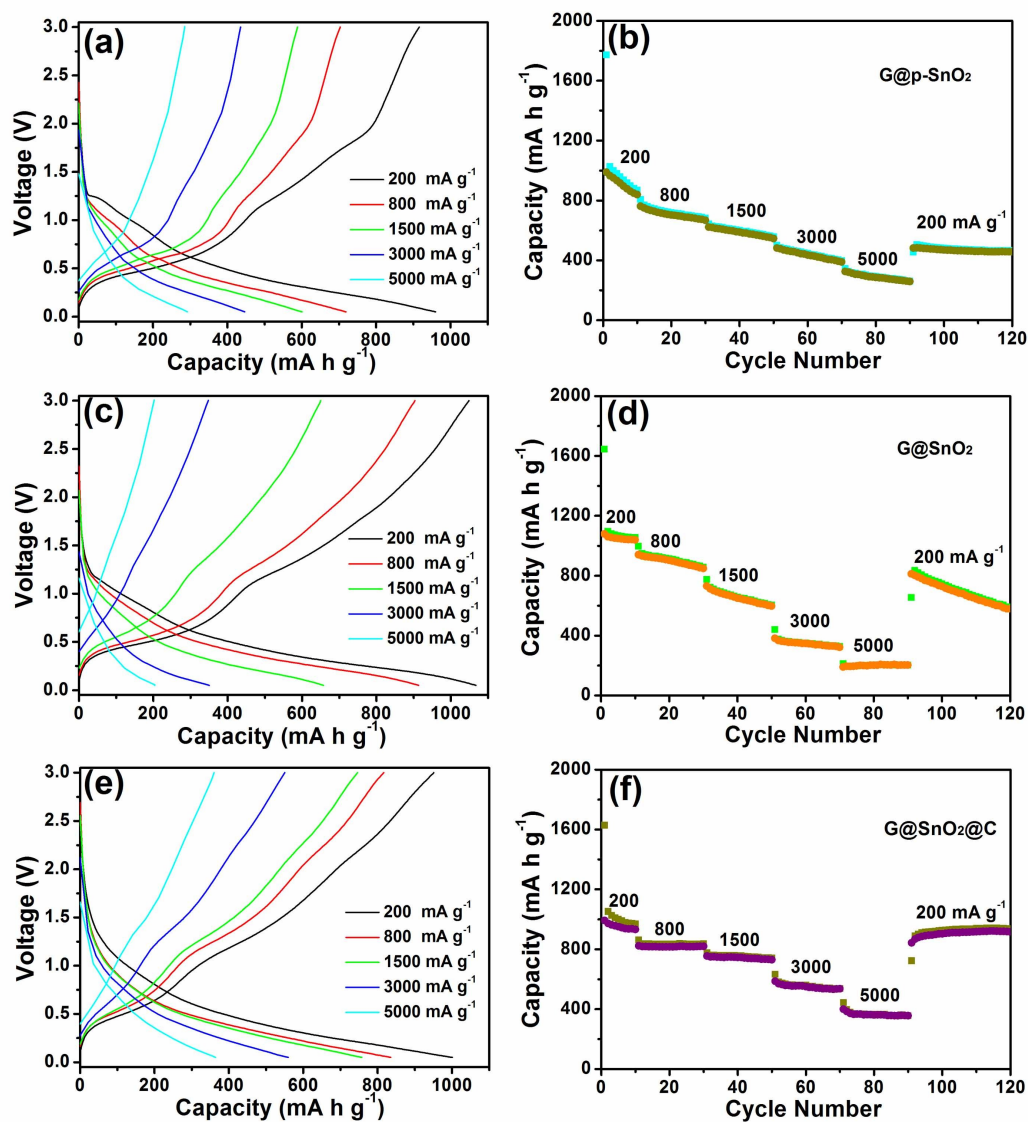

**Fig. S15** (a, c, e) Discharge and charge profiles at various current densities and (b, d, f) rate performance of (a-b) G@p-SnO<sub>2</sub>, (c-d) G@SnO<sub>2</sub>, and (e-f) G@SnO<sub>2</sub>@C composites.

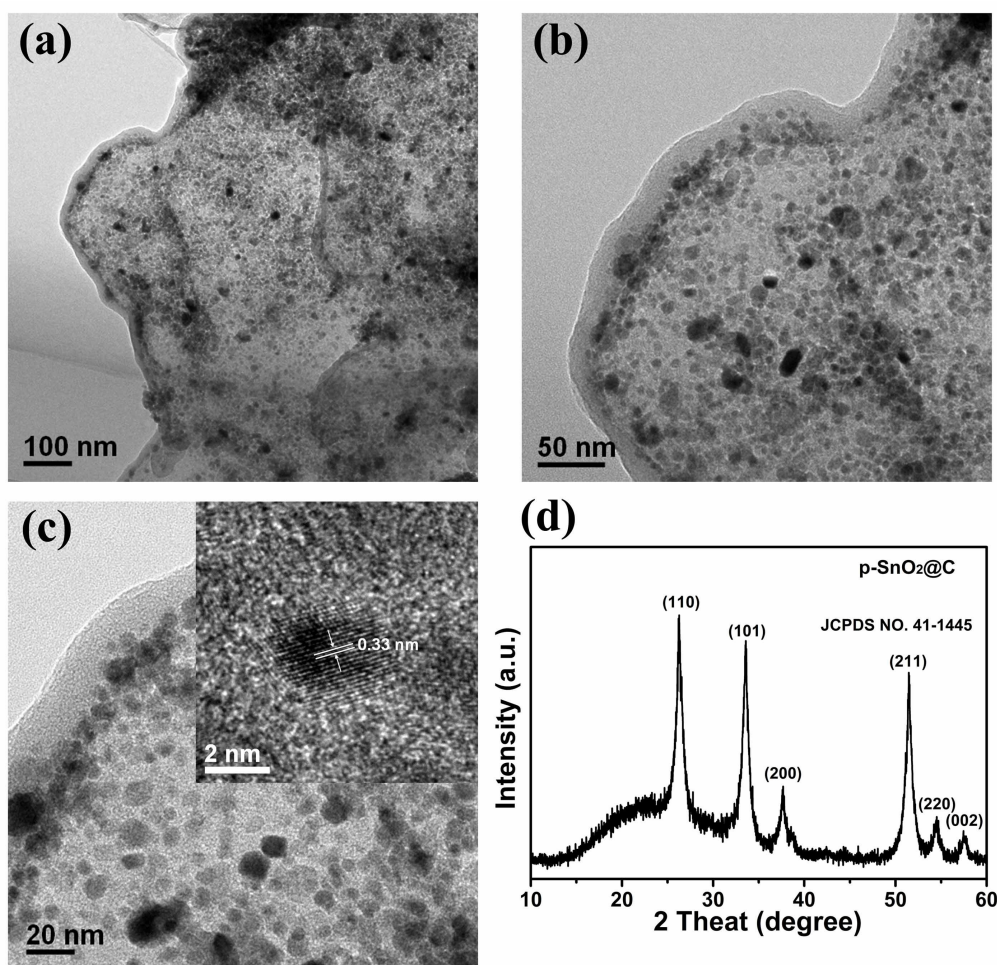

**Fig. S16** (a-c) TEM images of p-SnO<sub>2</sub>@C composite under various magnifications. Inset in (c) is the HRTEM image of SnO<sub>2</sub> NPs. (d) XRD pattern of p-SnO<sub>2</sub>@C composite.



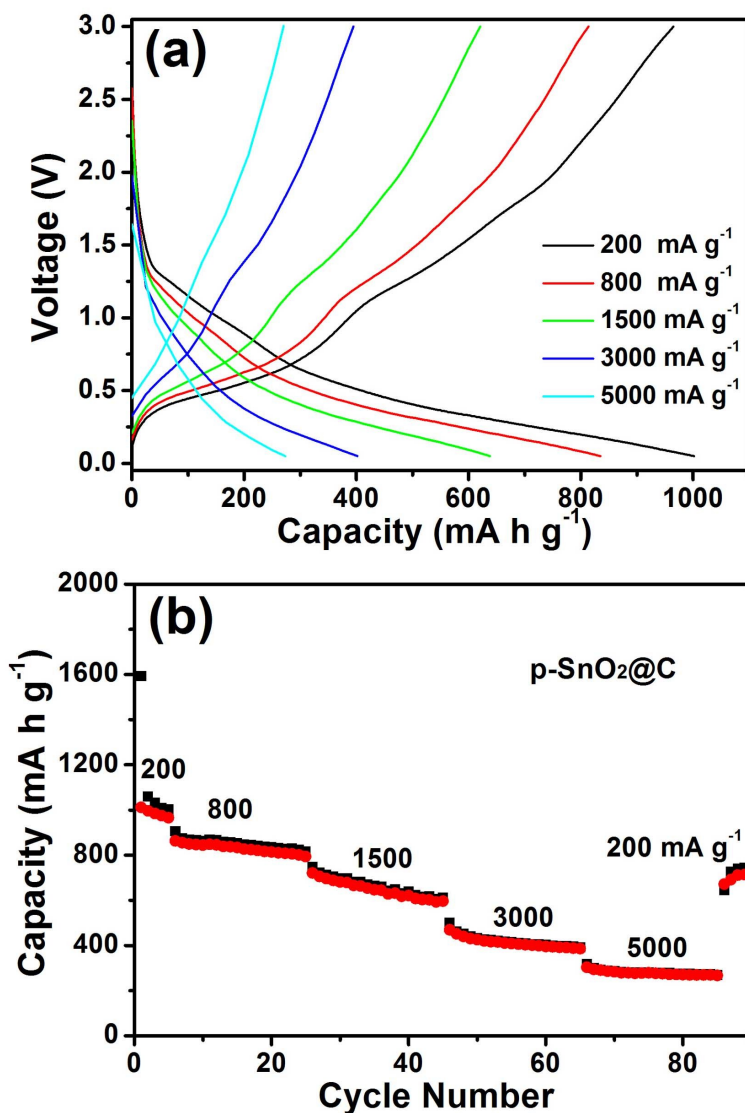

**Fig. S17** (a) Discharge and charge profiles and (b) rate performance of p-SnO<sub>2</sub>@C composite at various current densities. At high rate of 1.5, 3, and 5.0 A g<sup>-1</sup>, p-SnO<sub>2</sub>@C only delivered rate capabilities of 630, 400, and 270 mA h g<sup>-1</sup>, much lower than the values of G@p-SnO<sub>2</sub>@C. This result demonstrated that the existence of rGO can significantly enhance the rate performance of G@p-SnO<sub>2</sub>@C composite, probably due to the effect of rGO to improve both the electron and Li<sup>+</sup> ion transport and shorten their diffusion length.

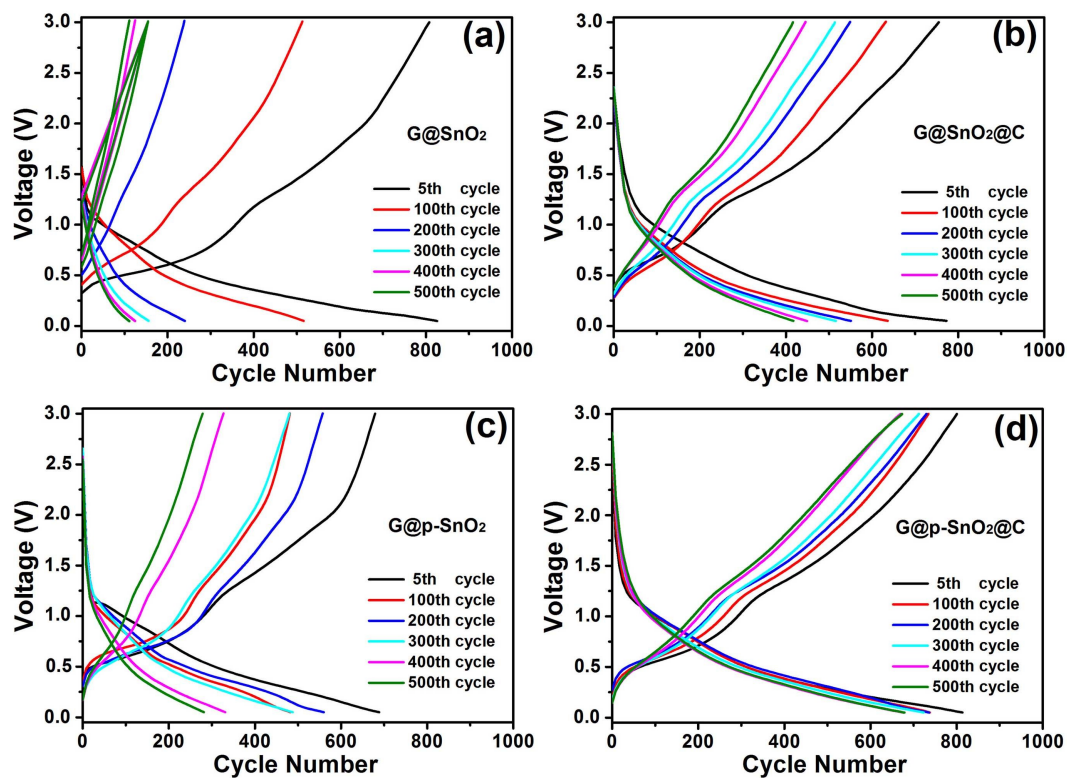

**Fig. S18** Typical discharge-charge profiles of (a) G@SnO<sub>2</sub>, (b) G@SnO<sub>2</sub>@C, (c) G@p-SnO<sub>2</sub>, and (d) G@p-SnO<sub>2</sub>@C composites at 1.5 A g<sup>-1</sup>.

**Table S1.** Electrochemical performance of SnO<sub>2</sub>-based anode materials for LIBs.

| Materials                                          | Current density (mA g <sup>-1</sup> ) | Cycle Number | Capacity (mAh g <sup>-1</sup> ) | Loading of active material (mg cm <sup>-2</sup> ) | Reference |
|----------------------------------------------------|---------------------------------------|--------------|---------------------------------|---------------------------------------------------|-----------|
| <b>Nanostructured SnO<sub>2</sub> anodes</b>       |                                       |              |                                 |                                                   |           |
| SnO <sub>2</sub> nanowires                         | 100                                   | <b>50</b>    | ~230                            | -                                                 | [1]       |
| Hollow SnO <sub>2</sub> sphere                     | 160                                   | <b>20</b>    | ~650                            | -                                                 | [2]       |
| SnO <sub>2</sub> nanotube                          | 100                                   | <b>30</b>    | 468                             | -                                                 | [3]       |
| SnO <sub>2</sub> nanoboxes                         | 0.2 C                                 | <b>40</b>    | 570                             | -                                                 | [4]       |
| Interconnected SnO <sub>2</sub> NPs                | 1500                                  | <b>100</b>   | 430                             | -                                                 | [5]       |
| SnO <sub>2</sub> -in-TiO <sub>2</sub> wire-in-tube | 400                                   | <b>1000</b>  | 393                             | 4.15                                              | [6]       |
| SnO <sub>2</sub> /NiO nanotube@Ag                  | 1000                                  | <b>500</b>   | 826                             | 3                                                 | [7]       |
| SnO <sub>2</sub> hollow microsphere                | 100                                   | <b>50</b>    | 750                             | 1                                                 | [8]       |
| <b>SnO<sub>2</sub>-carbon based anodes</b>         |                                       |              |                                 |                                                   |           |
| Hollow SnO <sub>2</sub> @C                         | 500                                   | <b>100</b>   | 460                             | 1.5                                               | [9]       |
| SnO <sub>2</sub> @C nanotube                       | 200                                   | <b>50</b>    | 700                             | -                                                 | [10]      |
| SnO <sub>2</sub> @C microboxes                     | 200                                   | <b>150</b>   | 550                             | -                                                 | [11]      |
| SnO <sub>2</sub> @C nanotube                       | 500                                   | <b>200</b>   | 596                             | -                                                 | [12]      |
| SnO <sub>2</sub> @C                                | 100                                   | <b>200</b>   | 880                             | -                                                 | [13]      |
| Hollow SnO <sub>2</sub> @N-C box                   | 500                                   | <b>100</b>   | 491                             | 1.5                                               | [14]      |
| SnO <sub>2</sub> in porous carbon                  | 1000                                  | <b>800</b>   | 930                             | 0.7-1                                             | [15]      |
| SnO <sub>2</sub> @N-carbon nanofiber               | 1000                                  | <b>300</b>   | 754                             | -                                                 | [16]      |
| Yolk-shell SnO <sub>2</sub> @C                     | 1C                                    | <b>300</b>   | 516                             | 0.6-1.0                                           | [17]      |
| SnO <sub>2</sub> @C nanotube                       | 500                                   | <b>100</b>   | 663                             | -                                                 | [18]      |
| Hollow SnO <sub>2</sub> @C microsphere             | 500                                   | <b>100</b>   | 600                             | -                                                 | [19]      |
| SnO <sub>2</sub> @C                                | 200                                   | <b>550</b>   | 649                             | -                                                 | [20]      |



|                                              |             |             |             |                |                  |
|----------------------------------------------|-------------|-------------|-------------|----------------|------------------|
| Pipe-Wire<br>TiO <sub>2</sub> -Sn@CNF        | 200         | <b>1100</b> | 643         | -              | [21]             |
| SnO <sub>2</sub> -polydopamine<br>coating    | 160         | <b>300</b>  | 1300        | -              | [22]             |
| SnO <sub>2</sub> -Mn-graphite                | 1000        | <b>900</b>  | 600         | 1.0-1.5        | [23]             |
| <b>Graphene-SnO<sub>2</sub> based anodes</b> |             |             |             |                |                  |
| Graphene@SnO <sub>2</sub>                    | 50          | <b>30</b>   | 570         | -              | [24]             |
| N-doped G@SnO <sub>2</sub>                   | 50          | <b>50</b>   | 910         | -              | [25]             |
| G@porous SnO <sub>2</sub>                    | 78.2        | <b>50</b>   | 847         | -              | [26]             |
| N-doped G@SnO <sub>2</sub>                   | 500         | <b>500</b>  | 1346        | 10             | [27]             |
| G@SnO <sub>2</sub> @C                        | 200         | <b>100</b>  | 800         | -              | [28]             |
| G@SnO <sub>2</sub> nanorod@C                 | 1000        | <b>330</b>  | ~770        | -              | [29]             |
| G@SnO <sub>2</sub> @C                        | 100         | <b>360</b>  | 1165        | -              | [30]             |
| CNT@SnO <sub>2</sub> @C                      | 1000        | <b>100</b>  | 1100        | -              | [31]             |
| G@SnO <sub>2</sub> -SnS@C                    | 100         | <b>110</b>  | 1236        | -              | [32]             |
| Hollow SnO <sub>2</sub> @G                   | 1000        | <b>500</b>  | 552         | 1.5-2.0        | [33]             |
| Graphene-SnO <sub>2-x</sub>                  | 200         | <b>100</b>  | 950         | -              | [34]             |
| Graphene-SnO <sub>2</sub>                    | 1000        | <b>230</b>  | 970         | 3              | [35]             |
| Sb-SnO <sub>2</sub> -CNT-graphene            | 1000        | <b>1000</b> | 685         | 1.2            | [36]             |
| <b>G@p-SnO<sub>2</sub>@G</b>                 | <b>200</b>  | <b>200</b>  | <b>1146</b> | <b>0.8-1.2</b> | <b>this work</b> |
|                                              | <b>1500</b> | <b>1800</b> | <b>418</b>  |                |                  |

---

- [1] M. S. Park, G. X. Wang, Y. M. Kang, D. Wexler, S. X. Dou, H. K. Liu, *Angew. Chem. Int. Edit.* **2007**, 46, 750.
- [2] S. J. Ding, J. S. Chen, G. G. Qi, X. N. Duan, Z. Y. Wang, E. P. Giannelis, L. A. Archer, X. W. Lou, *J. Am. Chem. Soc.* **2011**, 133, 21.
- [3] J. F. Ye, H. J. Zhang, R. Yang, X. G. Li, L. M. Qi, *Small* 2010, 6, 296.

- [4] Z. Y. Wang, D. Y. Luan, F. Y. C. Boey, X. W. Lou, *J. Am. Chem. Soc.* **2011**, 133, 4738.
- [5] V. Etacheri, G. A. Seisenbaeva, J. Caruthers, G. Daniel, J. M. Nedelec, V. G. Kessler, V. G. Pol, *Adv. Energy Mater.* **2015**, 5.
- [6] C. Guan, X. H. Wang, Q. Zhang, Z. X. Fan, H. Zhang, H. J. Fan, *Nano Lett.* **2014**, 14, 4852.
- [7] C. Kim, J. W. Jung, K. R. Yoon, D. Y. Youn, S. Park, I. D. Kim, *Acs Nano* **2016**, 10, 11317.
- [8] J. Zhang, H. Ren, J. Y. Wang, J. Qi, R. B. Yu, D. Wang, Y. L. Liu, *J. Mater. Chem. A* **2016**, 4, 17673.
- [9] X. W. Lou, C. M. Li, L. A. Archer, *Adv. Mater.* **2009**, 21, 2536.
- [10] L. Zhang, G. Q. Zhang, H. B. Wu, L. Yu, X. W. Lou, *Adv. Mater.* **2013**, 25, 2589.
- [11] L. Zhang, H. B. Wu, B. Liu, X. W. Lou, *Energy Environ. Sci.* **2014**, 7, 1013.
- [12] X. S. Zhou, L. Yu, X. W. Lou, *Nanoscale* **2016**, 8, 8384.
- [13] M. H. Wang, H. Yang, X. L. Zhou, W. Shi, Z. Zhou, P. Cheng, *Chem. Commun.* **2016**, 52, 717.
- [14] X. S. Zhou, L. Yu, X. W. Lou, *Adv. Energy Mater.* **2016**, 6, 1600451.
- [15] L. Shen, F. Liu, G. Chen, H. H. Zhou, Z. Y. Le, H. B. Wu, G. Wang, Y. F. Lu, *J. Mater. Chem. A* **2016**, 4, 18706.
- [16] L. Xia, S. Q. Wang, G. X. Liu, L. X. Ding, D. D. Li, H. H. Wang, S. Z. Qiao, *Small* **2016**, 12, 853.
- [17] B. Huang, X. H. Li, Y. Pei, S. Li, X. Cao, R. C. Masse, G. Z. Cao, *Small* **2016**, 12, 1945.
- [18] C. H. Han, B. X. Zhang, K. N. Zhao, J. S. Meng, Q. He, P. He, W. Yang, Q. Li, L. Q. Mai, *Chem. Commun.* **2017**, 53, 9542.
- [19] L. L. Hu, L. P. Yang, D. Zhang, X. S. Tao, C. Zeng, A. M. Cao, L. J. Wan, *Chem. Commun.* **2017**, 53, 11189.
- [20] L. Y. Yang, S. T. Li, J. Liu, K. J. Zhu, S. L. Liu, M. Lei, *J. Mater. Chem. A* **2017**, 5, 1629.
- [21] M. L. Mao, F. L. Yan, C. Y. Cui, J. M. Ma, M. Zhang, T. H. Wang, C. S. Wang,

Nano Lett. **2017**, 17, 3830.

[22]B. B. Jiang, Y. J. He, B. Li, S. Q. Zhao, S. Wang, Y. B. He, Z. Q. Lin, Angew. Chem. Int. Edit. **2017**, 56, 1869.

[23]R. Z. Hu, Y. P. Ouyang, T. Liang, X. Tang, B. Yuan, J. Liu, L. Zhang, L. C. Yang, M. Zhu, Energy Environ. Sci. **2017**, 10, 2017.

[24]S. M. Paek, E. Yoo, I. Honma, Nano Lett. **2009**, 9, 72.

[25]X. Wang, X. Q. Cao, L. Bourgeois, H. Guan, S. M. Chen, Y. T. Zhong, D. M. Tang, H. Q. Li, T. Y. Zhai, L. Li, Y. Bando, D. Golberg, Adv. Funct. Mater. **2012**, 22, 2682.

[26]S. Yang, W. B. Yue, J. Zhu, Y. Ren, X. J. Yang, Adv. Funct. Mater. **2013**, 23, 3570.

[27]X. S. Zhou, L. J. Wan, Y. G. Guo, Adv. Mater. **2013**, 25, 2152.

[28]Y. Z. Su, S. Li, D. Q. Wu, F. Zhang, H. W. Liang, P. F. Gao, C. Cheng, X. L. Feng, Acs Nano. **2012**, 6, 8349.

[29]D. N. Wang, J. L. Yang, X. F. Li, D. S. Geng, R. Y. Li, M. Cai, T. K. Sham, X. L. Sun, Energy Environ. Sci. **2013**, 6, 2900.

[30]Y. X. Liu, P. Liu, D. Q. Wu, Y. S. Huang, Y. P. Tang, Y. Z. Su, F. Zhang, X. L. Feng, Chem. Eur. J. **2015**, 21, 5617.

[31]C. R. Ma, W. M. Zhang, Y. S. He, Q. Gong, H. Y. Che, Z. F. Ma, Nanoscale **2016**, 8, 4121.

[32]J. Q. Shan, Y. X. Liu, P. Liu, Y. S. Huang, Y. Z. Su, D. Q. Wu, X. L. Feng, J. Mater. Chem. A **2015**, 3, 24148.

[33]X. Hu, G. Zeng, J. X. Chen, C. Z. Lu, Z. H. Wen, J. Mater. Chem. A **2017**, 5, 4535.

[34]W. J. Dong, J. J. Xu, C. Wang, Y. Lu, X. Y. Liu, X. Wang, X. T. Yuan, Z. Wang, T. Q. Lin, M. L. Sui, I. W. Chen, F. Q. Huang, Adv. Mater. **2017**, 29, 1700136.

[35]W. H. Chen, K. M. Song, L. W. Mi, X. M. Feng, J. M. Zhang, S. Z. Cui, C. T. Liu, J. Mater. Chem. A **2017**, 5, 10027.

[36]J. Cui, S. Yao, J.-Q. Huang, L. Qin, W. G. Chong, Z. Sadighi, J. Huang, Z. Wang, J.-K. Kim, Energy Storage Materials **2017**, 9, 85.

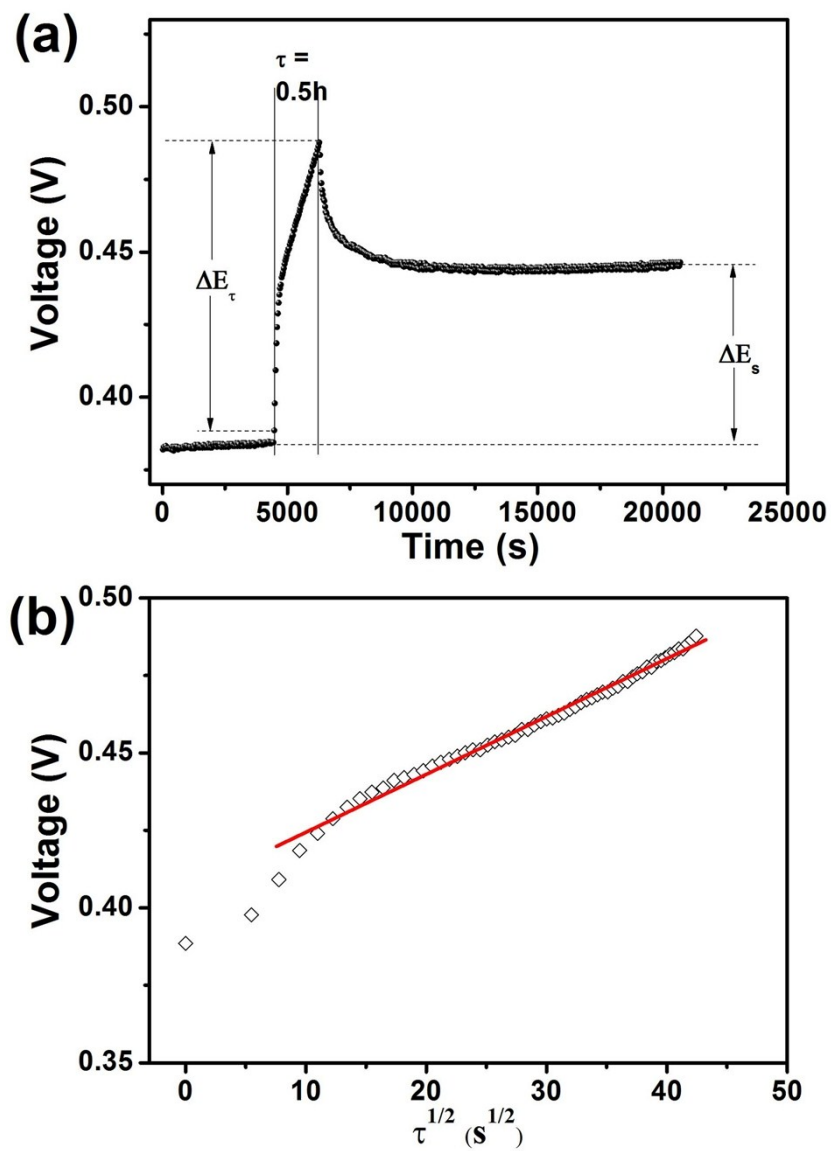

**Fig. S19** (a) A single titration profile of G@p-SnO<sub>2</sub>@C electrode during the third charge cycle with schematic illustration of different parameters. (b) Variation of voltage against  $\tau^{1/2}$  to show the linear fit.

**Table. S2** The fitting impedance parameters of G@p-SnO<sub>2</sub>@C and G@p-SnO<sub>2</sub> electrodes after cycles.

| electrodes              | cycles | R <sub>s</sub> | R <sub>SEI</sub> | R <sub>ct</sub> |
|-------------------------|--------|----------------|------------------|-----------------|
| G@p-SnO <sub>2</sub> @C | 3th    | 5.99           | 13.44            | 47.68           |
|                         | 100th  | 14.93          | 17.77            | 43.21           |
| G@p-SnO <sub>2</sub>    | 3th    | 5.88           | 9.11             | 59.61           |
|                         | 100th  | 17.1           | 14.99            | 113.3           |

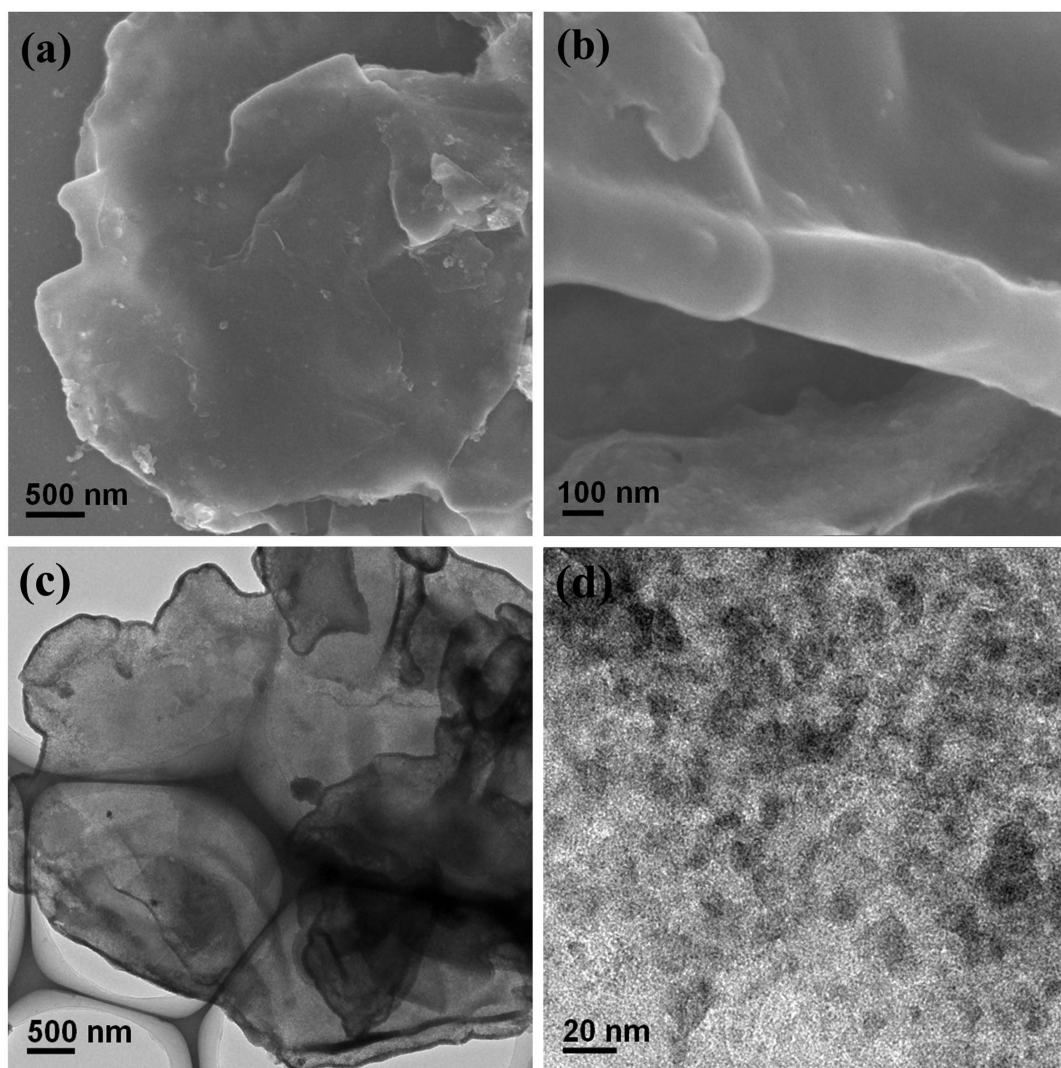

**Fig. S20** (a-b) SEM and (c-d) TEM images of G@p-SnO<sub>2</sub>@C electrode after 100 cycles, showing the excellent structure stability of this composite during cycles.
